# Supplementary material for: Beneficial effects exerted by hydroxychloroquine in treating COVID-19 patients via protecting multiple organs
Source: Springer Nature journal article supplement (doi:10.1007/s11427-020-1782-1), 2020-08-03
Supplement: 11427_2020_1782_MOESM1_ESM.docx [file 11427_2020_1782_MOESM1_ESM.docx]

**Supporting Information**

**Patients and Methods**

**Study Design and Patients:** This was a single center, retrospective study which was approved by the institute ethic committee in Tongji Hospital, Tongji Medical College, Huazhong University of Science and Technology (IRBID: TJ-IRB20200229). There were 278 patients who received HCQ treatment (HCQ) and 2604 patients who have not received HCQ treatment (NHCQ) as control for critical patients and non-critical patients, respectively (Figure S1). All these patients were over 18 years old and were diagnosed as COVID-19 with positive pathogen laboratory tests and according to the WHO interim guideline and the Clinical Guideline for COVID-19 Diagnosis and Treatment published by the National Health Commission of China between February 1 of 2020 and April 4 of 2020. The written informed consent has been waived by the Ethics Committee because of the retrospective and anonymous nature of the data.

**Data Collection**: The electronic medical records of the COVID-19 patients including medical history, chest CT, and laboratory tests, in-hospital therapies, and clinical deposits (death or cured discharge), were extracted by data coordinators through the electronic medical records and were reviewed by a team of experienced physicians. Laboratory test results included serum inflammatory cytokines, liver function, coagulation tests, urine tests, and counts of white blood cells in peripheral blood.

**Clinical outcome:** We analyzed the effects of HCQ treatment on cytokine factors, serum albumin levels, which reflect hepatic function, cardiac injury as defined by the elevated levels of serum cardiac troponin I (cTnI), N-terminal pro-brain natriuretic peptide (NT-ProBNP), and the changes of peripheral blood white blood cells.

**Statistics:** Continuous values were expressed as medians and interquartile range, and categorical variables as counts and percentages. In these patients, the comparisons of continuous values between groups were performed with Wilcoxon rank-sum tests because of non-normal distribution. Categorical variables were compared using Chi-square test or Fisher test was used. Laboratory parameters closest to each observation time were collect to analysis changes. In NHCQ-treated groups, 10th day after admission was considered as cut-off time in contrast to HCQ-treated start time (Median time to start using HCQ was 10 (5-15) days after hospitalized). All statistical analyses were performed with R packages (version 3.1.4, Vienna, Austria).


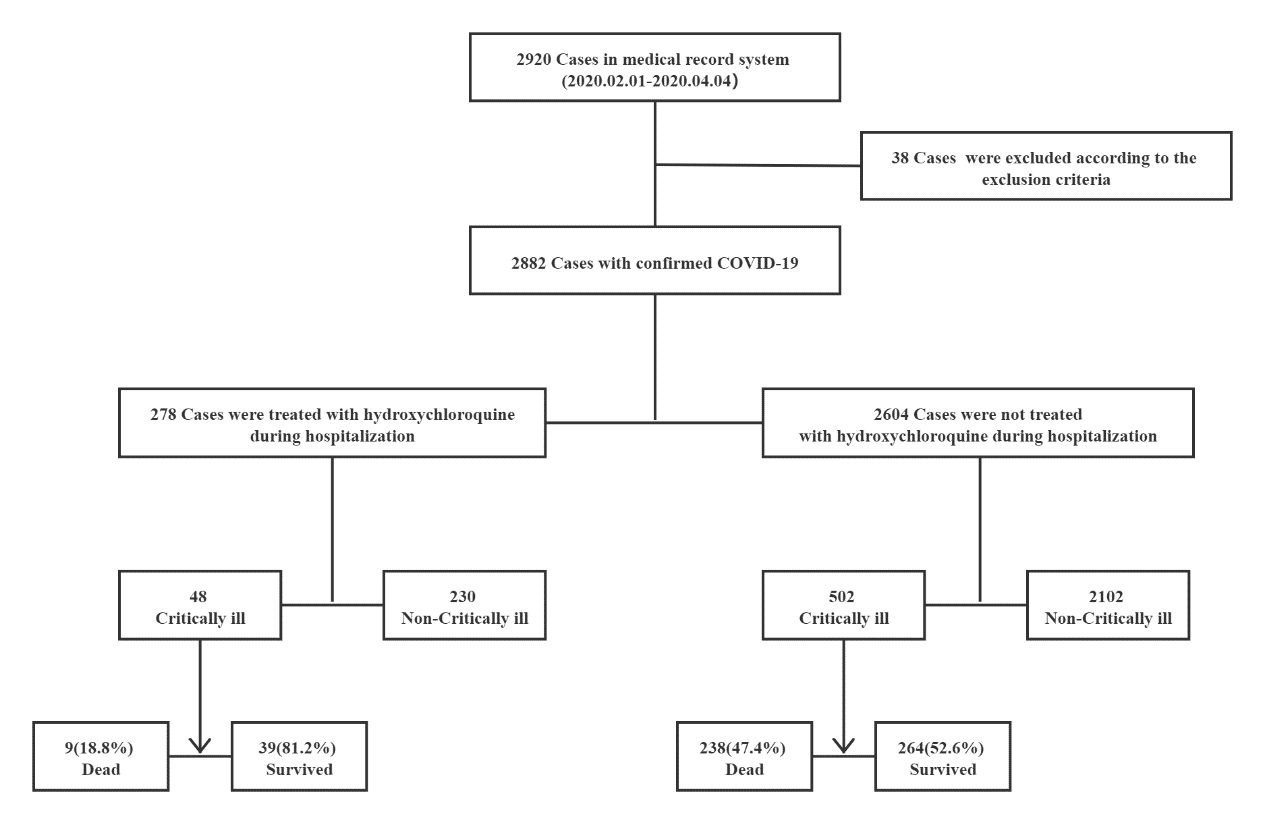


**Figure S1** Flowchart for patient recruitment. Exclusion criteria: (1) less than 18 years old; (2) allergic to 4-chloroquinoline compounds.

Table S1. Baseline characteristics of COVID-19 patients#

|  | All patients  (n = 2882) | Non-Critically ill | |  |
| --- | --- | --- | --- | --- |
| Characteristics | HCQ  (n = 230) | NHCQ  (n = 2102) | *P* |
| Age, years | 62 (50-69) | 64 (53-70) | 59 (47-68) | <0.001 |
| Age range, years (%) |  |  |  |  |
| <60 | 1278 (44.3) | 87 (37.8) | 1052 (50.0) | <0.001 |
| ≥60 | 1604 (55.7) | 143 (62.2) | 1050 (50.0) | <0.001 |
| Gender, male, no. (%) | 1427 (49.5) | 104 (45.2) | 979 (46.6) | 0.695 |
| Original comorbidities, no. (%) |  |  |  |  |
| Hypertension | 871 (30.2) | 79 (34.3) | 540 (25.7) | 0.005 |
| Coronary heart disease | 215 (7.5) | 15 (6.5) | 141 (6.7) | 0.915 |
| COPD | 36 (1.2) | 3 (1.3) | 17 (0.8) | 0.439 |
| Diabetes | 400 (13.9) | 26 (11.3) | 280 (13.3) | 0.390 |
| Vital Signs |  |  |  |  |
| Body temperature, °C | 36.6 (36.3-37.0) | 36.6 (36.4-37.0) | 36.6 (36.3-37.0) | 0.179 |
| Pulse, beats/min | 89 (80-102) | 89 (78-100) | 88 (80-100) | 0.504 |
| Respiratory rate, breaths/min | 20 (20-22) | 20 (20-29) | 20 (20-22) | <0.001 |
| Systolic blood pressure, mmHg | 130 (119-144) | 134 (120-146) | 130 (119-142) | 0.014 |
| Diastolic blood pressure, mmHg | 80 (72-89) | 80 (73-88) | 80 (73-89) | 0.664 |
| SpO2, % | 97 (95-98) | 97 (96-98) | 97 (96-98) | 0.055 |
| Laboratory parameters, |  |  |  |  |
| White-cell count, ×109/L | 5.9 (4.6-7.6) | 5.5 (4.5-7.1) | 5.6 (4.5-7.1) | 0.893 |
| Lymphocyte count, ×109/L | 1.2 (0.8-1.7) | 1.3 (0.9-1.7) | 1.3 (1.0-1.8) | 0.045 |
| Neutrophil count, ×109/L | 3.8 (2.7-5.4) | 3.6 (2.7-4.9) | 3.5 (2.6-4.8) | 0.743 |
| Platelet count, ×109/L | 222.0  (169.0-287.8) | 236.0  (173.0-300.0) | 229.0  (179.0-291.0) | 0.737 |
| Hemoglobin, g/L | 127.0  (115.3-138.0) | 126.0  (116.0-137.0) | 127.0  (117.0-138.0) | 0.443 |
| Alanine aminotransferase, U/L | 22.0 (14.0-37.5) | 23.0 (14.0-48.0) | 21.0 (14.0-36.0) | 0.082 |
| Aspartate aminotransferase, U/L | 24.0 (18.0-36.0) | 25.0 (17.0-36.0) | 23.0 (18.0-32.0) | 0.077 |
| Total bilirubin, μmol/L | 9.0 (6.6-12.3) | 8.5 (6.2-11.7) | 8.5 (6.4-11.7) | 0.926 |
| Albumin, g/L | 36.5 (32.3-40.7) | 36.3 (32.4-40.4) | 37.9 (34.0-41.6) | <0.001 |
| Lactate dehydrogenase, U/L | 241.0  (192.0-328.0) | 246.0  (205.0-314.0) | 222.0  (184.0-288.0) | <0.001 |
| Creatinine, μmol/L | 68.0 (56.0-83.0) | 66.0 (56.0-81.0) | 66.0 (56.0-79.0) | 0.730 |
| Blood urea nitrogen, mmol/L | 4.6 (3.5-5.9) | 4.3 (3.4-5.5) | 4.3 (3.4-5.4) | 0.962 |
| International normalized ratio | 1.1 (1.0-1.1) | 1.0 (1.0-1.1) | 1.0 (1.0-1.1) | 0.913 |
| D-dimer, mg/L | 0.6 (0.3-1.6) | 0.6 (0.3-1.5) | 0.5 (0.2-1.1) | 0.006 |
| APTT, Sec | 38.6 (35.8-42.3) | 38.7 (36.1-41.6) | 38.3 (35.7-41.6) | 0.320 |
| C-reactive protein, mg/L | 10.8 (1.7-57.9) | 9.9 (2.3-37.6) | 5.2 (1.2-33.1) | 0.001 |
| NT-ProBNP, pg/mL | 103.0  (36.0-335.0) | 97.0  (39.0-258.0) | 71.0  (27.0-185.0) | 0.004 |
| cTnI, pg/mL | 4.0 (1.9-10.3) | 3.8 (1.9-8.4) | 3.0 (1.9-6.7) | 0.040 |
| IL-6, pg/mL | 4.9 (1.7-23.6) | 7.7 (2.5-21.4) | 3.2 (1.5-11.1) | <0.001 |
| IL-10, pg/mL | 5.0 (5.0-6.0) | 5.0 (5.0-5.0) | 5.0 (5.0-5.0) | 0.974 |
| IL-8, pg/mL | 11.3 (7.1-21.3) | 12.6 (7.6-25.0) | 9.8 (6.6-17.2) | 0.006 |
| TNF-α, pg/mL | 8.1 (6.1-10.6) | 8.8 (6.7-11.1) | 7.6 (5.9-9.7) | 0.001 |
| IL-1β, pg/mL | 5.0 (5.0-5.0) | 5.0 (5.0-5.0) | 5.0 (5.0-5.0) | 0.332 |
| IL-2R, U/mL | 482.0  (307.0-806.0) | 541.0  (314.0-794.0) | 407.0  (281.0-654.0) | 0.002 |
| Data were presented as medians and interquartile range (Q1-Q3). HCQ, Hydroxychloroquine; NHCQ, Non-Hydroxychloroquine; COPD, chronic obstructive pulmonary disease; SpO2, percutaneous oxygen saturation; APTT , activated partial thromboplastin time; NT-proBNP, N-terminal pro-B-type natriuretic peptide; cTnI, cardiac troponin I; IL, interleukin; TNF-α, tumor necrosis factor-α.  # data in critically ill group had published in previous articles(Yu et al., 2020). | | | | | |

Table S2. Laboratory parameters after treated with HCQ in critically ill COVID-19 patients

| Laboratory parameters# | Groups | Before treatment | Days after treatment | | | |
| --- | --- | --- | --- | --- | --- | --- |
| 5 days | 10 days | 15 days | 20 days |
| TNF-α, pg/mL | HCQ | 10.8 (5.9-16.8) | 10.2 (7.0-14.3) | 7.5 (5.8-11.1) | 9.6 (9.4-20.1) | 9.2 (6.4-13.0) |
| NHCQ | 10.8 (7.3-16.1) | 12.1 (7.7-16.9) | 10.6 (6.6-14.1) | 9.4 (6.6-13.1) | 10.7 (7.1-15.0) |
| IL-2R, U/mL | HCQ | 838.0 (498.0-1305.3) | 658.5 (440.5-1184.0) | 608.0 (353.5-846.5) | 962.0 (790.0-1229.0) | 654.5 (340.8-873.0) |
| NHCQ | 890.5 (615.0-1337.0) | 833.5 (585.5-1290.3) | 720.0 (455.0-1079.0) | 608.0 (425.5-906.0) | 634.0 (400.0-1009.0) |
| IL-1β, pg/mL | HCQ | 5.0 (5.0-6.9) | 5.0 (5.0-10.0) | 5.0 (5.0-7.0) | 5.0 (5.0-6.7) | 5.0 (5.0-5.0) |
| NHCQ | 5.0 (5.0-5.1) | 5.0 (5.0-5.8) | 5.0 (5.0-5.4) | 5.0 (5.0-5.0) | 5.0 (5.0-5.9) |
| IL-8, pg/mL | HCQ | 14.8 (5.8-27.8) | 11.5 (7.4-22.6) | 14.8 (7.4-30.5) | 29.4 (14.0-40.4) | 14.5 (9.5-24.4) |
| NHCQ | 16.9 (8.1-29.7) | 15.1 (8.7-39.9) | 16.8 (7.7-39.6) | 14.3 (8.2-20.1) | 13.6 (9.1-30.0) |
| Albumin, g/L | HCQ | 32.9 (27.6-36.5) | 32.9 (30.3-36.5) | 34.9 (32.7-39.7)*† | 37.5 (32.6-41.0)* | 39.0 (36.7-43.3)*† |
| NHCQ | 32.2 (28.7-35.8) | 32.5 (28.2-36.1) | 33.9 (29.3-37.3) | 35.2 (31.7-38.5)* | 36.1 (33.2-39.0)* |
| ALT, U/L | HCQ | 32.0 (24.0-71.0) | 27.0 (16.3-42.5) | 26.0 (17.0-38.0)* | 18.0 (12.5-26.0)* | 22.5 (16.8-26.5) |
| NHCQ | 28.0 (17.0-54.0) | 26.0 (16.0-43.0) | 27.0 (14.0-45.0) | 24.0 (14.3-38.8)* | 22.0 (14.0-32.8)* |
| AST, U/L | HCQ | 29.0 (17.0-47.0) | 22.0 (17.0-30.8) | 21.0 (17.0-25.0)*† | 20.0 (17.5-26.0)* | 21.5 (16.8-25.3) |
| NHCQ | 27.0 (19.0-42.0) | 25.0 (18.0-39.3) | 26.0 (16.5-39.0) | 21.0 (16.0-28.8)* | 21.0 (17.0-27.0)* |
| NT-ProBNP, pg/mL | HCQ | 1070.0 (418.0-6691.0) | 265.0 (140.0-2957.0) | 517.0 (88.0-936.0) | 213.0 (89.3-1811.5) | 203.0 (41.0-865.0)*† |
| NHCQ | 1000.0 (365.5-3881.5) | 1046.5 (436.8-4105.8) | 1877.5 (129.0-4899.3) | 1156.0 (141.0-4493.0) | 2874.0 (170.0-5368.0) |
| cTnI, pg/mL | HCQ | 14.5 (2.9-30.9) | 11.1 (3.7-21.2) | 7.1 (4.0-30.8) | 7.2 (2.4-28.7) | 5.3 (2.3-17.4)† |
| NHCQ | 19.1 (6.3-91.3) | 16.6 (7.7-87.6) | 16.4 (4.2-53.9) | 10.9 (4.3-34.5) | 20.2 (8.4-57.2) |
| LDL, mmol/L | HCQ | 2.2 (1.3-2.8) | 2.4 (2.4-3.0) | 2.3 (1.9-3.7) | 2.6 (2.0-3.6) | 3.2 (2.4-3.8) |
| NHCQ | 2.0 (1.5-2.6) | 1.9 (1.4-2.5) | 2.3 (1.6-3.0) | 2.4 (1.7-3.0) | 2.3 (1.7-3.1) |
| HDL, mmol/L | HCQ | 0.9 (0.6-1.3) | 1.0 (0.8-1.1) | 1.0 (0.6-1.4) | 1.0 (0.9-1.2) | 0.9 (0.9-1.0) |
| NHCQ | 0.8 (0.6-1.0) | 0.9 (0.6-1.1) | 0.9 (0.7-1.1) | 0.8 (0.7-1.1) | 0.9 (0.6-1.2) |
| TC, mmol/L | HCQ | 3.3 (1.7-4.3) | 3.8 (3.6-4.8) | 3.8 (3.3-5.4) | 4.5 (3.4-5.5) | 4.4 (3.6-5.6) |
| NHCQ | 3.2 (2.8-4.3) | 3.2 (2.8-4.1) | 3.6 (2.9-4.6) | 3.8 (3.0-4.9) | 3.7 (2.9-4.7) |
| APTT, Sec | HCQ | 40.1 (36.7-45.5) | 38.8 (36.2-45.5) | 38.7 (36.2-42.6) | 42.8 (36.1-46.9) | 40.9 (36.3-47.1) |
| NHCQ | 38.3 (34.9-45.8) | 39.1 (35.0-45.6) | 39.6 (36.1-45.3) | 38.9 (35.8-42.8) | 39.6 (36.5-44.3) |
| D-dimer, mg/L | HCQ | 2.8 (1.4-7.8) | 2.0 (1.2-4.6) | 1.9 (1.0-3.3) | 1.5 (0.9-2.2) | 2.2 (1.4-2.6) |
| NHCQ | 4.3 (1.6-11.0) | 2.8 (1.2-5.5) | 2.0 (0.9-3.8)* | 1.6 (0.9-2.6)* | 1.4 (0.8-2.5)* |
| INR | HCQ | 1.1 (1.0-1.3) | 1.1 (1.0-1.2) | 1.0 (1.0-1.1) | 1.1 (1.1-1.2) | 1.1 (1.0-1.2) |
| NHCQ | 1.2 (1.1-1.3) | 1.1 (1.0-1.2) | 1.1 (1.0-1.2) | 1.1 (1.0-1.1) | 1.1 (1.0-1.2) |
| White-cell count, ×109/L | HCQ | 8.5 (5.3-13.8) | 7.5 (4.9-11.5) | 6.0 (5.3-8.9) | 6.4 (3.9-10.3) | 5.4 (3.5-10.0)* |
| NHCQ | 9.3 (6.6-12.5) | 8.7 (5.8-12.2) | 7.6 (5.3-10.5) | 6.3 (4.8-8.9) | 6.0 (4.8-8.5)* |
| Lymphocyte count, ×109/L | HCQ | 0.9 (0.4-1.3) | 1.0 (0.7-1.5) | 1.3 (0.9-1.8)*† | 1.1 (0.9-1.8) | 1.2 (0.9-1.7) |
| NHCQ | 0.7 (0.4-1.2) | 0.9 (0.6-1.4) | 1.1 (0.7-1.5) | 1.3 (0.8-1.6)* | 1.3 (0.9-1.7)* |
| Neutrophil count, ×109/L | HCQ | 7.5 (4.0-10.8) | 4.6 (3.3-9.4) | 4.2 (3.3-6.4)* | 3.5 (2.7-6.2)* | 3.0 (1.6-8.7)* |
| NHCQ | 7.6 (5.1-11.3) | 6.7 (3.9-10.4) | 5.2 (3.4-8.6) | 4.2 (3.0-6.8)* | 3.9 (2.8-6.0)* |
| Platelet count, ×109/L | HCQ | 227.0 (143.3-382.5) | 220.5 (152.5-294.0) | 195.0 (153.0-277.5) | 182.0 (146.0-282.0) | 178.5 (135.5-284.3) |
| NHCQ | 167.0 (88.0-242.0)† | 190.0 (116.5-260.5) | 182.0 (127.5-239.3) | 201.0 (143.3-271.0) | 205.0 (146.5-272.0) |

Data were presented as medians and interquartile range (Q1-Q3). * compared with treatment before, p <0.05; † compared with HCQ-treated and NHCQ-treated in same period, p <0.05. HCQ, Hydroxychloroquine; NHCQ, Non-Hydroxychloroquine; IL, interleukin; TNF-α, tumor necrosis factor-α; ALT, Alanine aminotransferase; AST, Aspartate aminotransferase; NT-proBNP, N-terminal pro-B-type natriuretic peptide; cTnI, cardiac troponin I; LDL, low-density lipoprotein; HDL, high-density lipoprotein; TC, total cholesterol; APTT , activated partial thromboplastin time; INR, International normalized ratio.

# data of IL-6 level of critically ill COVID-19 patients had published in previous articles(Yu et al., 2020).

Table S3. Laboratory parameters after treated with HCQ in Non-critically ill COVID-19 patients

| Laboratory parameters | Groups | Before treatment | Days after treatment | | | |
| --- | --- | --- | --- | --- | --- | --- |
| 5 days | 10 days | 15 days | 20 days |
| IL-6, pg/mL | HCQ | 4.3 (2.0-16.6) | 3.1 (1.5-8.9) | 2.9 (1.6-5.2)*† | 3.6 (2.2-7.0) | 2.9 (1.5-9.3) |
| NHCQ | 3.8 (1.8-9.6) | 3.4 (1.8-7.1) | 3.8 (1.9-7.7) | 3.4 (1.7-6.9) | 3.3 (1.5-6.3) |
| TNF-α, pg/mL | HCQ | 8.5 (6.7-10.7) | 8.0 (5.3-10.7) | 7.5 (5.7-9.6) | 9.0 (6.3-11.9) | 9.0 (6.3-11.3) |
| NHCQ | 6.4 (5.1-9.0) | 7.6 (5.7-10.3) | 8.3 (5.7-11.6) | 8.3 (6.3-10.7) | 9.2 (6.8-11.2) |
| IL-2R, U/mL | HCQ | 440.5 (303.3-631.5) | 433.5 (314.3-603.3) | 405.5 (250.8-622.5) | 421.0 (272.0-607.0) | 557.0 (324.8-707.5) |
| NHCQ | 459.0 (297.5-625.5) | 502.0 (315.0-682.0) | 465.5 (329.3-641.0) | 435.0 (323.0-598.5) | 422.0 (308.0-611.0) |
| IL-1β, pg/mL | HCQ | 5.0 (5.0-5.0) | 5.0 (5.0-5.0) | 5.0 (5.0-5.0) | 5.0 (5.0-7.6) | 5.0 (5.0-5.2) |
| NHCQ | 5.0 (5.0-5.0) | 5.0 (5.0-5.0) | 5.0 (5.0-5.0) | 5.0 (5.0-5.0) | 5.0 (5.0-5.0) |
| IL-8, pg/mL | HCQ | 8.9 (6.5-14.0) | 10.8 (6.4-21.8) | 7.8 (5.1-12.3) | 9.8 (6.9-29.7) | 10.9 (6.2-18.6) |
| NHCQ | 7.2 (5.0-10.6) | 8.0 (5.3-12.0) | 9.0 (5.2-15.9) | 9.2 (6.6-14.3) | 9.1 (6.5-12.6) |
| Albumin, g/L | HCQ | 36.3 (32.9-40.2) | 39.1 (35.0-41.9)*† | 39.0 (36.0-41.9)* | 39.3 (36.5-42.5)* | 38.2 (35.4-41.5) |
| NHCQ | 36.4 (32.7-39.8) | 36.9 (33.9-40.0) | 37.8 (35.5-40.7) | 38.7 (35.7-40.9) | 38.9 (36.3-41.0) |
| ALT, U/L | HCQ | 25.0 (15.0-43.0) | 22.5 (15.0-36.0) | 20.0 (14.0-43.0) | 19.0 (12.0-35.0) | 18.0 (13.0-39.0) |
| NHCQ | 24.0 (15.0-42.0) | 24.0 (15.0-39.0) | 22.0 (14.0-38.0) | 21.0 (13.0-36.0) | 21.0 (12.5-34.5) |
| AST, U/L | HCQ | 22.0 (17.0-29.0) | 20.0 (16.0-26.0) | 19.0 (16.0-25.5) | 20.0 (15.0-24.3) | 17.0 (15.0-28.0) |
| NHCQ | 20.0 (16.0-27.0) | 20.0 (16.0-27.0) | 20.0 (15.0-28.0) | 20.0 (16.0-26.0) | 19.0 (15.0-26.0) |
| NT-ProBNP, pg/mL | HCQ | 68.0 (21.0-339.0) | 86.0 (36.8-235.0) | 202.0 (72.0-656.8) | 117.5 (60.0-267.8) | 123.0 (47.5-412.3) |
| NHCQ | 89.0 (34.0-240.8) | 79.5 (30.0-252.5) | 70.0 (29.0-182.0) | 62.5 (25.0-152.0) | 89.5 (42.3-171.8) |
| cTnI, pg/mL | HCQ | 2.7 (1.9-7.2) | 3.2 (1.9-6.6) | 3.2 (1.9-7.4) | 4.2 (2.8-7.6) | 4.4 (2.2-10.0) |
| NHCQ | 2.5 (1.9-5.0) | 2.1 (1.9-4.8) | 2.0 (1.9-4.6) | 2.3 (1.9-4.5) | 2.4 (1.9-5.4) |
| LDL, mmol/L | HCQ | 2.5 (2.0-3.2) | 2.6 (2.1-3.2) | 2.5 (2.1-3.0) | 2.7 (2.0-3.4) | 2.7 (2.1-3.2) |
| NHCQ | 2.5 (2.1-3.2) | 2.7 (2.1-3.2) | 2.7 (2.0-3.3) | 2.7 (2.2-3.4) | 2.9 (2.3-3.5) |
| HDL, mmol/L | HCQ | 1.0 (0.9-1.3) | 1.0 (0.9-1.3) | 1.1 (0.9-1.4) | 1.0 (0.9-1.3) | 1.1 (0.8-1.3) |
| NHCQ | 1.0 (0.8-1.3) | 1.0 (0.9-1.3) | 1.1(0.9-1.3) | 1.0 (0.9-1.2) | 1.1 (0.9-1.3) |
| TC, mmol/L | HCQ | 4.1 (3.6-4.8) | 4.0 (3.4-4.9) | 4.1 (3.7-4.6) | 4.2 (3.2-4.8) | 4.1 (3.6-4.8) |
| NHCQ | 4.1 (3.5-5.0) | 4.3 (3.6-4.9) | 4.3 (3.6-5.1) | 4.3 (3.7-5.0) | 4.3 (3.8-5.2) |
| APTT, Sec | HCQ | 37.4 (35.1-40.2) | 37.9 (35.9-41.2) | 38.3 (36.2-41.6) | 40.5 (37.1-43.9) | 38.7 (36.0-42.2) |
| NHCQ | 37.8 (35.3-42.4) | 37.9 (35.1-41.2) | 37.7 (35.0-41.3) | 37.9 (35.3-41.7) | 38.0 (35.9-42.2) |
| D-dimer, mg/L | HCQ | 0.5 (0.3-1.5) | 0.4 (0.2-1.2) | 0.4 (0.2-1.0) | 0.7 (0.2-1.8) | 0.5 (0.3-1.5) |
| NHCQ | 0.5 (0.3-1.4) | 0.6 (0.3-1.2) | 0.5 (0.3-1.1) | 0.5 (0.2-1.3) | 0.5 (0.3-1.1) |
| INR | HCQ | 1.0 (1.0-1.1) | 1.0 (1.0-1.1) | 1.0 (1.0-1.1) | 1.0 (1.0-1.1) | 1.0 (1.0-1.1) |
| NHCQ | 1.1 (1.0-1.1) | 1.0 (1.0-1.1) | 1.0 (1.0-1.1) | 1.0 (1.0-1.1) | 1.0 (1.0-1.1) |
| White-cell count, ×109/L | HCQ | 6.1 (5.0-8.2) | 6.0 (5.2-7.8) | 5.5 (4.2-7.3) | 5.9 (4.7-7.7) | 5.8 (4.9-7.2) |
| NHCQ | 5.9 (4.9-7.3) | 5.8 (4.8-7.4) | 5.5 (4.5-6.9) | 5.4 (4.5-6.8) | 5.4 (4.4-6.6) |
| Lymphocyte count, ×109/L | HCQ | 1.5 (1.0-2.0) | 1.5 (1.2-2.0) | 1.6 (1.2-2.0) | 1.7 (1.2-2.0) | 1.5 (1.2-1.8) |
| NHCQ | 1.5 (1.2-1.9) | 1.5 (1.2-1.9) | 1.5 (1.2-1.9) | 1.4 (1.2-1.8) | 1.5 (1.1-1.8) |
| Neutrophil count, ×109/L | HCQ | 3.6 (2.8-6.0) | 3.6 (2.7-5.2) | 3.1 (2.3-4.5) | 3.4 (2.4-5.3) | 3.6 (2.6-5.1) |
| NHCQ | 3.7 (2.7-4.7) | 3.5 (2.7-4.8) | 3.3 (2.4-4.3) | 3.2 (2.5-4.1) | 3.1 (2.3-4.0) |
| Platelet count, ×109/L | HCQ | 214.0 (173.0-268.0) | 212.0 (165.5-272.5) | 193.0 (157.0-240.5) | 203.0 (169.5-239.5) | 199.0 (166.0-239.3) |
| NHCQ | 236.5 (182.0-304.8) | 226.0 (182.0-282.0) | 210.0 (171.0-258.0) | 211.0 (171.8-255.0) | 210.5 (169.8-258.8) |

Data were presented as medians and interquartile range (Q1-Q3). * compared with those before treatment, p <0.05; † compared with HCQ-treated and NHCQ-treated in same period, p <0.05. Abbreviations: HCQ, Hydroxychloroquine; NHCQ, Non-Hydroxychloroquine; IL, interleukin; TNF-α, tumor necrosis factor-α; ALT, Alanine aminotransferase; AST, Aspartate aminotransferase; NT-proBNP, N-terminal pro-B-type natriuretic peptide; cTnI, cardiac troponin I; LDL, low-density lipoprotein; HDL, high-density lipoprotein; TC, total cholesterol; APTT , activated partial thromboplastin time; INR, International normalized ratio.

Reference

Yu, B., Li, C., Chen, P., Zhou, N., Wang, L., Li, J., Jiang, H., & Wang, D. W. (2020). Low dose of hydroxychloroquine reduces fatality of critically ill patients with COVID-19. Sci China Life Sci. doi:10.1007/s11427-020-1732-2
